# Supplementary material for: To new heights by flying low: comparison of aircraft vertical NO 2 profiles to model simulations and implications for TROPOMI NO 2 retrievals
Source: Copernicus journal article supplement (doi:10.5194/amt-16-5287-2023), 2023-11-08
Supplement: Supplementary file 1 [file amt-16-5287-2023-supplement.zip]

Archive with 4 entries (4 files):
- 21134_transect1_NOx.gif
- readme.txt
- amt-16-5287-2023-supplement-title-page.pdf
- 2nd_submission_supp_v2.pdf
