# Supplementary material for: To new heights by flying low: comparison of aircraft vertical NO 2 profiles to model simulations and implications for TROPOMI NO 2 retrievals
Source: Copernicus journal article supplement (doi:10.5194/amt-16-5287-2023), 2023-11-08
Supplement: Supplementary file 1 [file amt-16-5287-2023-supplement.zip › amt-16-5287-2023-supplement-title-page.pdf]

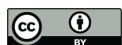

## *Supplement of*

# **To new heights by flying low: comparison of aircraft vertical NO<sub>2</sub> profiles to model simulations and implications for TROPOMI NO<sub>2</sub> retrievals**

**Tobias Christoph Valentin Werner Riess et al.**

*Correspondence to:* Tobias Christoph Valentin Werner Riess ([christoph.riess@wur.nl](mailto:christoph.riess@wur.nl))

- [amt-16-5287-2023-supplement-title-page.pdf](#)
- [21134\\_transect1\\_NOx.gif](#)
- [2nd\\_submission\\_supp\\_v2.pdf](#)
- [readme.txt](#)

The copyright of individual parts of the supplement might differ from the article licence.
