# Supplementary material for: To new heights by flying low: comparison of aircraft vertical NO 2 profiles to model simulations and implications for TROPOMI NO 2 retrievals
Source: Copernicus journal article supplement (doi:10.5194/amt-16-5287-2023), 2023-11-08
Supplement: Supplementary file 1 [file amt-16-5287-2023-supplement.zip › readme.txt]

------------------
readme.txt
------------------
Belonging to 21134_transect1_NOx.gif as supplement of 

To new heights by flying low: 
Comparison of aircraft vertical NO2 profiles to model simulations and implications for TROPOMI NO2 retrievals 
Authors: Tobias Christoph Valentin Werner Riess, Klaas Folkert Boersma, Ward Van Roy, Jos de Laat, Enrico Dammers, and Jasper van Vliet

-----------------
Description:
Animation of one of the horizontal scans: Black and blue dots show ship path and plume center location at the moment indicated by
the timestamp, respectively, with lighter colors indicated older locations. In pink we see the flight path with the color indicating the measured
NOx concentration. The light blue lines show the edges of TROPOMI pixels for the coinciding orbit.


-----------------
end readme.txt
