# Supplementary figures and images for: To new heights by flying low: comparison of aircraft vertical NO 2 profiles to model simulations and implications for TROPOMI NO 2 retrievals
Source: Copernicus journal article supplement (doi:10.5194/amt-16-5287-2023), 2023-11-08

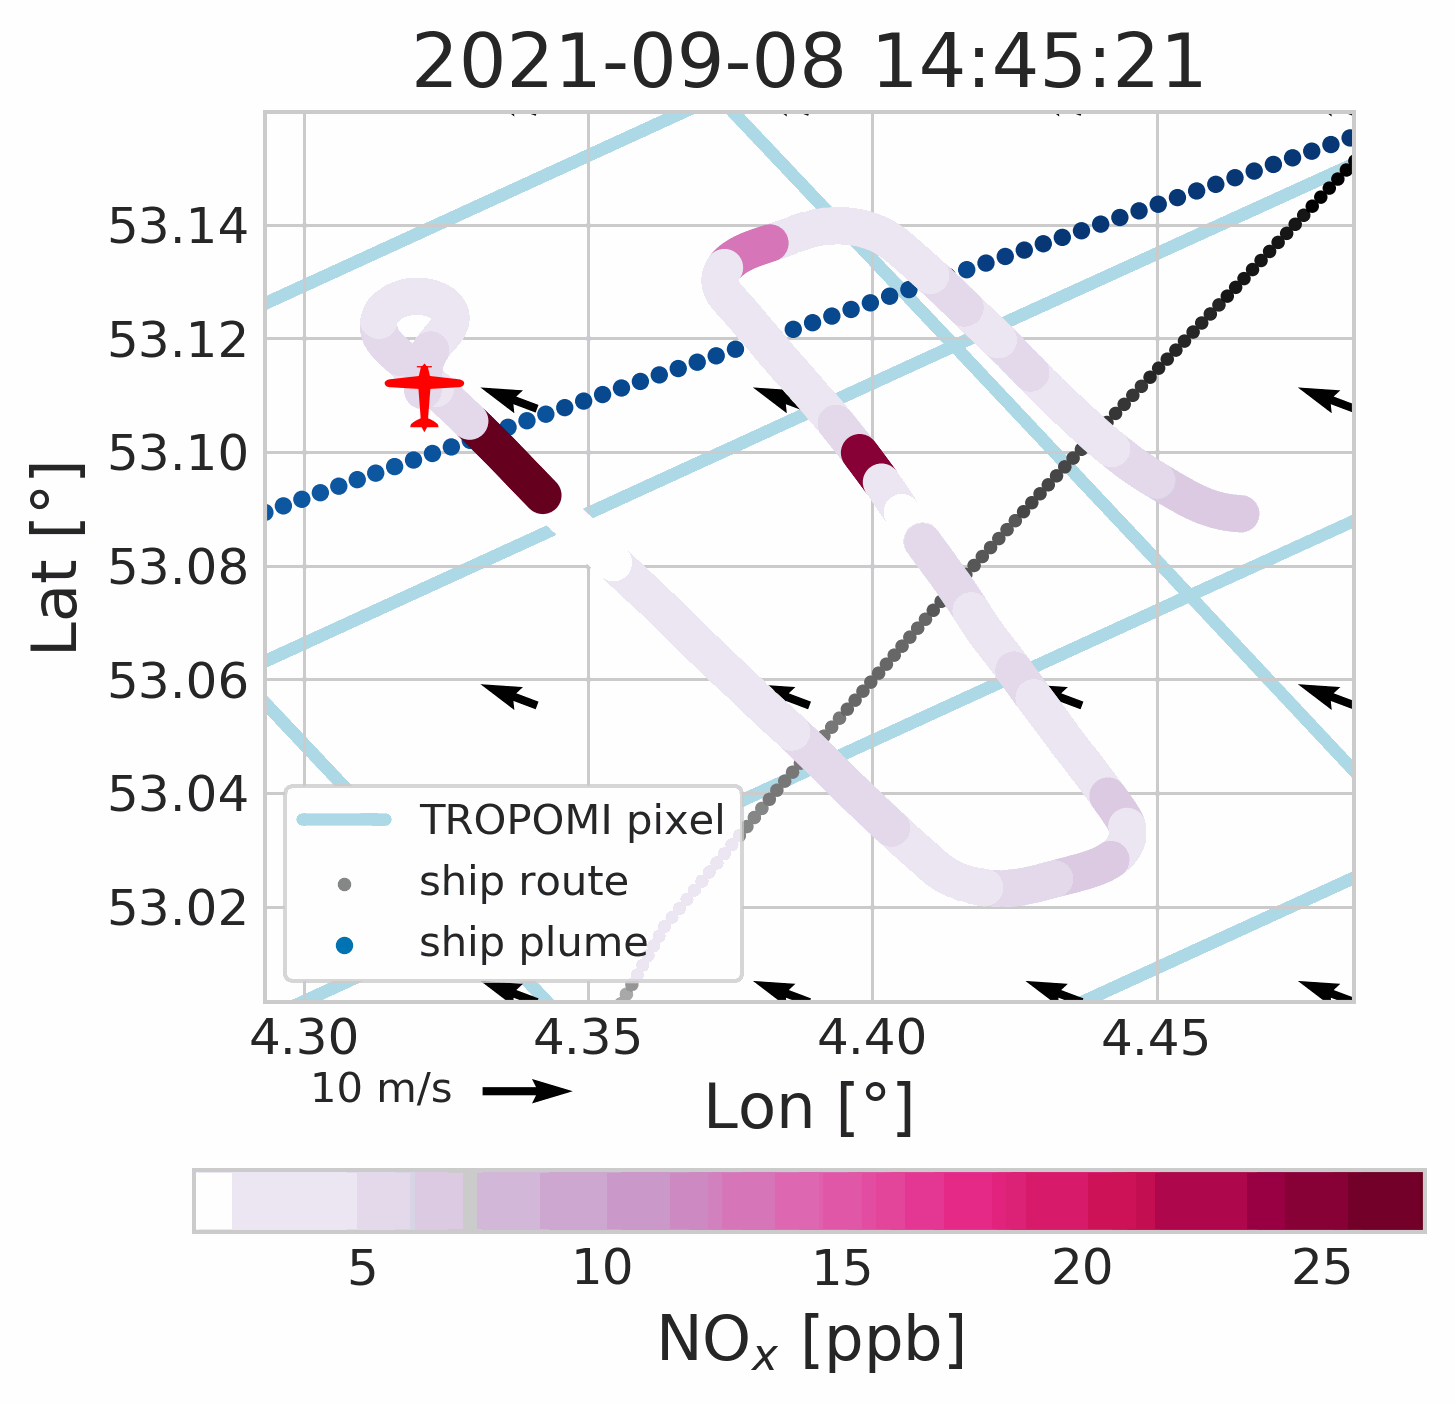

Supplement: Supplementary file 1 [file amt-16-5287-2023-supplement.zip › 21134_transect1_NOx.gif]
